# Supplementary material for: Rod and Cone Function Measured Objectively by Chromatic Pupil Campimetry Show a Different Preservation Between Distinct Genotypes in Retinitis Pigmentosa
Source: PubMed Central journal article supplement (PMC10431211; doi:10.1167/iovs.64.11.18), 2023-08-14
Supplement: iovs-64-11-18_s001.pdf [file iovs-64-11-18_s001.pdf]

| <b>Mutation type</b> | <b>Subject ID</b> | <b>Variant 1</b>                      | <b>Variant 2</b>                        | <b>Segregation analysis available</b> |
|----------------------|-------------------|---------------------------------------|-----------------------------------------|---------------------------------------|
| <b>EYS</b>           | EYS-01            | EYS c.67dup;p.Thr23AsnfsTer3          | EYS c.67dup;p.Thr23AsnfsTer4            |                                       |
|                      | EYS-02            | EYS c.4350_4356del;p.Ile1451ProfsTer3 | EYS c.4350_4356del;p.Ile1451ProfsTer3   |                                       |
|                      | EYS-03            | EYS c.9405T>A;p.Tyr3135Ter            | EYS c.9405T>A;p.Tyr3135Ter              |                                       |
|                      | EYS-04            | EYS c.3024C>A;p.Cys1008Ter            | EYS c.4350_4356del;p.Ile1451ProfsTer3   | yes                                   |
|                      | EYS-05            | EYS c.2055T>A;p.Cys685Ter             | EYS c.6714del;p.Ile2239SerfsTer17       | yes                                   |
|                      | EYS-06            | EYS Deletion Exons 1-12               | EYS Deletion Exons 3-4                  | yes                                   |
|                      | EYS-07            | EYS c.6714del;p.Ile2239SerfsTer17     | EYS c.6714del;p.Ile2239SerfsTer17       |                                       |
|                      | EYS-08            | EYS Deletion Exon 12                  | EYS Duplication/Inversion Exon 31       | yes                                   |
|                      | EYS-09            | EYS c.4045C>T;p.Arg1349Ter            | EYS c.8133_8137del;p.Phe2712Cysfs*3     |                                       |
|                      | EYS-10            | EYS c.2194C>T;p.Gln732Ter             | EYS c.2194C>T;p.Gln732Ter               |                                       |
|                      | EYS-11            | EYS c.490C>T;p.Arg164Ter              | EYS c.490C>T;p.Arg164Ter                |                                       |
|                      | EYS-12            | EYS Duplication Exons 23+24           | EYS Deletion Exon 15                    | yes                                   |
|                      | EYS-13            | EYS c.4045C>T;p.Arg1349Ter            | EYS c.4350_4356del;p.Ile1451ProfsTer3   | yes                                   |
|                      | EYS-14            | EYS c.8648_8649del;p.Thr2883MetfsTer6 | EYS c.7723+1G>A;p.?                     |                                       |
|                      |                   |                                       |                                         |                                       |
| <b>PDE6A</b>         | PDE6A-01          | PDE6A c.304C>A;p.Arg102Ser            | PDE6A c.2053G>A;p.Val685Met             |                                       |
|                      | PDE6A-02          | PDE6A c.1957C>T;p.Arg653Ter           | PDE6A c.1956_1957ins20bp;p.Arg653Ter    |                                       |
|                      | PDE6A-03          | PDE6A c.1705C>A;p.Gln569Lys           | PDE6A c.1705C>A;p.Gln569Lys             |                                       |
|                      | PDE6A-04          | PDE6A c.304C>A;p.Arg102Ser            | PDE6A c.304C>A;p.Arg102Ser              |                                       |
|                      | PDE6A-05          | PDE6A c.1065+2T>A;p.?                 | PDE6A c.1705C>A;p.Gln569Lys             | yes                                   |
|                      | PDE6A-06          | PDE6A c.1957C>T;p.Arg653Ter           | PDE6A c.1957C>T;p.Arg653Ter             |                                       |
|                      | PDE6A-07          | PDE6A c.1957C>T;p.Arg653Ter           | PDE6A c.1957C>T;p.Arg653Ter             |                                       |
|                      | PDE6A-08          | PDE6A c.1957C>T;p.Arg653Ter           | PDE6A c.2332_2335del;p.Asp778LeufsTer42 |                                       |
|                      | PDE6A-09          | PDE6A c.998+1G>A;p.?                  | PDE6A c.998+1G>A;p.?                    |                                       |
|                      | PDE6A-10          | PDE6A c.304C>A;p.Arg102Ser            | PDE6A c.1689C>A;p.His563Gln             | yes                                   |
|                      |                   |                                       |                                         |                                       |

| <b>Mutation type</b> | <b>Subject ID</b> | <b>Variant 1</b>                                            | <b>Variant 2</b>                                 | <b>Segregation analysis available</b> |
|----------------------|-------------------|-------------------------------------------------------------|--------------------------------------------------|---------------------------------------|
| <b>RPE65</b>         | Lux-01            | RPE65 c.1451G>T;p.Gly484Val                                 | RPE65 c.1451G>T;p.Gly484Val                      |                                       |
|                      | Lux-01            | RPE65 c.1451G>T;p.Gly484Val                                 | RPE65 c.1451G>T;p.Gly484Val                      |                                       |
|                      | Lux-02            | RPE65 c.1451G>T;p.Gly484Val                                 | RPE65 c.1451G>T;p.Gly484Val                      |                                       |
|                      | Lux-02            | RPE65 c.1451G>T;p.Gly484Val                                 | RPE65 c.1451G>T;p.Gly484Val                      |                                       |
|                      | Lux-03            | RPE65 c.1102T>C;p.Tyr368His                                 | RPE65 c.1102T>C;p.Tyr368His                      | yes                                   |
|                      | Lux-03            | RPE65 c.1102T>C;p.Tyr368His                                 | RPE65 c.1102T>C;p.Tyr368His                      | yes                                   |
|                      | Lux-04            | RPE65 c.1102T>C;p.Tyr368His                                 | RPE65 c.1102T>C;p.Tyr368His                      | yes                                   |
|                      | Lux-04            | RPE65 c.1102T>C;p.Tyr368His                                 | RPE65 c.1102T>C;p.Tyr368His                      | yes                                   |
|                      | Lux-08            | RPE65 c.208T>G;p.Phe70Val                                   | RPE65 c.246-11A>G;p.?                            |                                       |
|                      | Lux-10            | RPE65 c.1451G>T;p.Gly484Val                                 | RPE65 c.1451G>T;p.Gly484Val                      |                                       |
|                      | Lux-10            | RPE65 c.1451G>T;p.Gly484Val                                 | RPE65 c.1451G>T;p.Gly484Val                      |                                       |
|                      | Lux-11            | RPE65 c.1451G>T;p.Gly484Val                                 | RPE65 c.1451G>T;p.Gly484Val                      |                                       |
|                      | Lux-12            | RPE65 c.304G>T;p.Glu102Ter                                  | RPE65 c.304G>T;p.Glu102Ter                       | yes                                   |
|                      | Lux-12            | RPE65 c.304G>T;p.Glu102Ter                                  | RPE65 c.304G>T;p.Glu102Ter                       | yes                                   |
|                      | Lux-13            | RPE65 c.208T>G;p.Phe70Val                                   | RPE65 c.246-11A>G;p.?                            | yes                                   |
| <b>USH2A</b>         | USH2A-01          | USH2A c.653T>A;p.Val218Glu                                  | USH2A c.11105G>A;p.Trp3702Ter                    |                                       |
|                      | USH2A-03          | USH2A c.13010C>T;p.Thr4337Met                               | USH2A Deletion Exon 23                           | yes                                   |
|                      | USH2A-04          | USH2A c.949C>A;p.Arg317= (Splice Defect)                    | USH2A c.15496A>G;p.I5166V                        |                                       |
|                      | USH2A-05          | USH2A c.6084T>A;p.Tyr2028Ter                                | USH2A c.11864G>A p.Trp3955Ter                    |                                       |
|                      | USH2A-06          | USH2A c.2276G>T;p.Cys759Phe                                 | USH2A c.11864G>A;p.Trp3955Ter                    | yes                                   |
|                      | USH2A-07          | USH2A c.13335_13347delinsCTTG;p.Glu4445_Ser4449delinsAspLeu | USH2A c.10974_10975dup;p.Thr3659lIefsTer16       | yes                                   |
|                      | USH2A-08          | USH2A c.11864G>A;p.Trp3955Ter                               | USH2A c.8522G>A;p.Trp2841Ter                     |                                       |
|                      | USH2A-09          | USH2A c.3381del;p.Thr1128ProfsTer10                         | USH2A Deletion Exons 22-24                       |                                       |
|                      | USH2A-10          | USH2A c.7950dup;p.Asn2651GlnfsTer10                         | USH2A c.15063_15081delinsGC;p.Thr5022GlnfsTer150 | yes                                   |
|                      | USH2A-11          | USH2A c.11105G>Ap.Trp3702Ter                                | USH2A c.920_923dup;p.His308GlnfsTer16            | yes                                   |

| <b>Mutation type</b>  | <b>Subject ID</b> | <b>Variant 1</b>                       | <b>Variant 2</b> | <b>Segregation analysis available</b> |
|-----------------------|-------------------|----------------------------------------|------------------|---------------------------------------|
| <b><i>XL-RPGR</i></b> | XLRP-01           | RPGR c.2416G>T;p.Glu806Ter             |                  |                                       |
|                       | XLRP-03           | RPGR c.2426_2427del;p.Glu809GlyfsTer25 |                  |                                       |
|                       | XLRP-04           | RPGR c.2590G>T;p.Glu864Ter             |                  |                                       |
|                       | XLRP-05           | RPGR c.2405_2406del;p.Glu802GfsTer32   |                  |                                       |
|                       | XLRP-06           | RPGR c.296C>A;p.Thr99Asn               |                  |                                       |
|                       | XLRP-07           | RPGR c.2442_2445del;p.Gly817LysfsTer2  |                  |                                       |
|                       | XLRP-08           | RPGR c.2543del;p.Glu848GlyfsTer241     |                  |                                       |
|                       | XLRP-09           | RPGR c.2527dup;p.Glu843GlyfsTer236     |                  |                                       |
|                       | XLRP-10           | RPGR c.2405_2406del;p.Glu802GlyfsTer32 |                  |                                       |
|                       | XLRP-11           | RPGR c.1217dup;p.Ser407IlefsTer46      |                  |                                       |
|                       | XLRP-12           | RPGR c.2568dup;p.Lys857GlyfsTer222     |                  |                                       |
|                       | XLRP-13           | RPGR c.2323_2324del;p.Arg775GlyfsTer59 |                  | yes                                   |
|                       | XLRP-14           | RPGR c.2384del;p.Glu795GlyfsTer20      |                  |                                       |
|                       | XLRP-15           | RPGR c.2236_2237del;p.Glu746ArgfsTer23 |                  |                                       |

**Supplementary Table S1** Detailed information of genetic variants
